# Supplementary material for: Metabolomics analysis reveals changes related to pseudocyst formation induced by iron depletion in Trichomonas vaginalis
Source: Research Square preprint supplement (doi:10.21203/rs.3.rs-2688014/v1), 2023-03-17
Supplement: Supplementary file 1 [file 4a96bdfc3dd1bd3b35b04e4b.pdf]

Table 1. Statistics of the compounds identified in this study.

|                     | <b>Metabolites</b> | <b>With annotation</b> |
|---------------------|--------------------|------------------------|
| <b>Positive ion</b> | 1,802              | 536                    |
| <b>Negative ion</b> | 1,475              | 288                    |
| <b>Total</b>        | 3,277              | 824                    |
